# Supplementary material
Source: HighWire-hosted journal article supplement (http://www.qdcxjkg.com/highwire/filestream/113416/field_highwire_adjunct_files/0/online_depository.pdf)
Supplement: online_depository.pdf [file online_depository.pdf]

**Altitude illness is related to low hypoxic chemoresponse and low oxygenation during sleep**

By

Hugo Nespoulet, Bernard Wuyam, Renaud Tamisier, Carole Saunier, Denis Monneret, Judith Remy, Olivier Chabre, Jean-Louis Pépin, Patrick Lévy.

**Online Data Supplement**

E-add 1 Sleep studies in normoxia and hypoxia.

To achieve appropriate level of hypoxic exposure, we used a commercially available altitude tent (Hypoxico<sup>®</sup>, Colorado). Hypoxic environment was created by a compressor (oxygen extractor, Hypoxico<sup>®</sup>). The  $F_{iO_2}$  was continuously monitored using an  $O_2$  sensor (Maxtec OM-25MEI). A continuous flow of hypoxic gas through the tent minimized  $CO_2$  build up.

Two full night polysomnographies were performed.  $O_2$  saturation was monitored continuously and recorded for each subject overnight throughout the exposure (BlueNight<sup>®</sup>, SleepInnov Technology, Moirans, France). This allowed real-time monitoring of the exposure by the investigators. Polysomnographies were performed with an ambulatory system (Cidélec, Sainte-Gemmes sur Loire, France), analyzed manually with the added software package (Cidélec, Sainte-Gemmes sur Loire, France). Physiological signals included 2 electroencephalogram channels (CZ-O1 and C3-A2), submental electromyogram, and electro-oculogram. Chest wall and abdominal movements were assessed by non-calibrated inductive plethysmography and oxygen saturation by pulse oximetry. Airflow was monitored with a nasal cannula connected to a pressure transducer..

Sleep stages were analyzed manually using the standard criteria of Rechtschaffen and Kales. Microarousals were scored manually using ASDA criteria. Hypopneas were scored as either central or obstructive according to the following: a central hypopnea was scored when flow exhibited a decrease of more than 30% during at least 10 seconds, with a visually assessed proportional decrease in thoracic and abdominal movement without flow limitation and/or phase decay; if none of the preceding could be applied to the event, an obstructive hypopnea was scored. The obstructive or central nature of respiratory events was according to the occurrence of flow limitation, hypopnoea and/or apnoea on the nasal pressure trace and whether co-existing phase decay or opposite movement on thoracic and abdominal captors was observed or not.

E-table 1. High-altitude illness symptoms in « altitude intolérant » subjects and paired AMS-s.

AMS: Acute Mountain Sickness, HAPE/HACE : High Altitude Pulmonary/Cerebral Edema. AMS severity was estimated with Lake Louise Score.

| AMS+ 'altitude-intolerant' subjects or paired AMS- subjects           | LLS |
|-----------------------------------------------------------------------|-----|
| AMS- (maximal altitude ever reached = 4810 m)                         | 0   |
| AMS- (maximal altitude ever reached = 6700 m)                         | 0   |
| AMS- (maximal altitude ever reached = 5700 m)                         | 0   |
| AMS- (maximal altitude ever reached = 5000 m)                         | 0   |
| AMS- (maximal altitude ever reached = 4400 m)                         | 0   |
| AMS- (maximal altitude ever reached = 4810 m)                         | 0   |
| AMS- (maximal altitude ever reached = 5400 m)                         | 0   |
| AMS- (maximal altitude ever reached = 5100 m)                         | 0   |
| AMS- (maximal altitude ever reached = 5600 m)                         | 0   |
| AMS- (maximal altitude ever reached = 6800 m)                         | 0   |
| AMS- (maximal altitude ever reached = 4810 m)                         | 1   |
| AMS- (maximal altitude ever reached = 4810 m)                         | 1   |
| AMS+ (recurrent severe Acute Mountain Sickness and one HAPE at 4000m) | 12  |
| AMS+ (recurrent severe AMS at 3500m)                                  | 10  |
| AMS+ (severe AMS. Three HAPE between 3500 and 4000m)                  | 9   |
| AMS+ (recurrent severe AMS at 3400m)                                  | 8   |
| AMS+ (severe AMS. HAPE at 3600m)                                      | 12  |
| AMS+ (recurrent severe AMS at 3000m)                                  | 9   |
| AMS+ (severe AMS and two HAPE around 4000m)                           | 10  |
| AMS+ (recurrent severe AMS at 3500m)                                  | 8   |
| AMS+ (recurrent severe AMS at 3500 m and one HACE at 4800m)           | 12  |
| AMS+ (recurrent severe AMS at 3000m)                                  | 6   |
| AMS+ (recurrent severe AMS at 3500m)                                  | 12  |

|                                      |   |
|--------------------------------------|---|
| AMS+ (recurrent severe AMS at 3600m) | 8 |
|--------------------------------------|---|

E-table 2. Polysomnographic measurements during hypoxic night in both groups.

| Measurements                                                  |      | Mean $\pm$ SD   | Statistical comparisons |
|---------------------------------------------------------------|------|-----------------|-------------------------|
|                                                               |      |                 | P value                 |
| Number of intra-sleep arousal (>30s)                          | AMS+ | 29.8 $\pm$ 10.0 | 0.25                    |
|                                                               | AMS- | 26.7 $\pm$ 12.4 |                         |
| Total duration of intra-sleep wake time (min)                 | AMS+ | 70.4 $\pm$ 45.1 | 0.03                    |
|                                                               | AMS- | 44.9 $\pm$ 31.1 |                         |
| Number of micro-arousals (/h)                                 | AMS+ | 31.3 $\pm$ 17.3 | 0.1                     |
|                                                               | AMS- | 39.1 $\pm$ 15.9 |                         |
| Number of legs periodic movements                             | AMS+ | 26.2 $\pm$ 65.3 | 0.44                    |
|                                                               | AMS- | 30.5 $\pm$ 68.9 |                         |
| Number of micro-arousal related to legs periodic movements    | AMS+ | 19.8 $\pm$ 54.2 | 0.5                     |
|                                                               | AMS- | 20.3 $\pm$ 50.5 |                         |
| Number of micro-arousal related to legs periodic movements /h | AMS+ | 3.4 $\pm$ 9.6   | 0.5                     |
|                                                               | AMS- | 3.4 $\pm$ 8.4   |                         |

| Measurements                  |      | Mean $\pm$ SD   | Statistical comparisons |
|-------------------------------|------|-----------------|-------------------------|
|                               |      |                 | P value                 |
| AHI (events.h <sup>-1</sup> ) | AMS+ | 18.2 $\pm$ 18.1 | 0.038                   |
|                               | AMS- | 33.4 $\pm$ 24.8 |                         |
|                               |      |                 |                         |
| Apnea index (/h)              | AMS+ | 3.5 $\pm$ 9.4   | 0.037                   |
|                               | AMS- | 12.3 $\pm$ 13.7 |                         |
| Stage 1 Apneas index /h       | AMS+ | 8.2 $\pm$ 14.3  | 0.008                   |
|                               | AMS- | 75.2 $\pm$ 82.3 |                         |
| Stage II Apneas index /h      | AMS+ | 15.7 $\pm$ 40.4 | 0.049                   |
|                               | AMS- | 59.8 $\pm$ 76.9 |                         |
| Stage III/IV Apneas index /h  | AMS+ | 8.3 $\pm$ 27.2  | 0.16                    |
|                               | AMS- | 0.1 $\pm$ 0.4   |                         |
| REM Sleep Apneas index /h     | AMS+ | 0.4 $\pm$ 0.9   | 0.003                   |
|                               | AMS+ | 16.2 $\pm$ 15.9 |                         |
| Number of apneas (/TST)       | AMS+ | 20.8 $\pm$ 51.4 | 0.026                   |
|                               | AMS- | 78.9 $\pm$ 86.8 |                         |
| Cumulated duration of         | AMS+ | 1.1 $\pm$ 3.2   | 0.028                   |

|                                                       |      |              |       |
|-------------------------------------------------------|------|--------------|-------|
| apneas (% TST)                                        | AMS- | 5.0 ± 5.9    |       |
| Apneas mean duration (s)                              | AMS+ | 11.3 ± 5.6   | 0.16  |
|                                                       | AMS- | 13.8 ± 4.6   |       |
| Apneas longest duration (s)                           | AMS+ | 13.8 ± 7.1   | 0.04  |
|                                                       | AMS- | 20.6 ± 7.6   |       |
| Number of obstructive sleep apneas                    | AMS+ | 0.5 ± 1.4    | 0.028 |
|                                                       | AMS- | 2.4 ± 2.3    |       |
| Number of mixed sleep apneas                          | AMS+ | 0.4 ± 1.4    | 0.17  |
|                                                       | AMS- | 1.6 ± 3.6    |       |
| Number of central sleep apneas                        | AMS+ | 19.8 ± 49.5  | 0.03  |
|                                                       | AMS- | 74.8 ± 85.5  |       |
|                                                       |      |              |       |
| Hypopneas index /h                                    | AMS+ | 14.7 ± 11.6  | 0.1   |
|                                                       | AMS- | 21.1 ± 14.2  |       |
| Stage 1 Hypopneas index /h                            | AMS+ | 27.2 ± 21.5  | 0.03  |
|                                                       | AMS- | 68.4 ± 66.5  |       |
| Stage II Hypopneas index /h                           | AMS+ | 67.2 ± 60.7  | 0.14  |
|                                                       | AMS- | 95.4 ± 84.8  |       |
| Stage III/IV Hypopneas index /h                       | AMS+ | 2.1 ± 3.4    | 0.097 |
|                                                       | AMS- | 10.6 ± 20.9  |       |
| REM Sleep Hypopneas index /h                          | AMS+ | 53.2 ± 49.6  | 0.097 |
|                                                       | AMS- | 88.5 ± 70.4  |       |
| Total number of hypopneas                             | AMS+ | 87.2 ± 68.5  | 0.07  |
|                                                       | AMS- | 135.2 ± 92.5 |       |
| Number of central hypopneas                           | AMS+ | 49.8 ± 53.2  | 0.09  |
|                                                       | AMS- | 80.9 ± 90.7  |       |
| Number of obstructives hypopneas                      | AMS+ | 34.1 ± 63.4  | 0.2   |
|                                                       | AMS- | 52.3 ± 61.8  |       |
|                                                       |      |              |       |
| Limitation index /h                                   | AMS+ | 1.5 ± 1.5    | 0.3   |
|                                                       | AMS- | 1.9 ± 1.9    |       |
| AHI + flow limitation (events.h <sup>-1</sup> )       | AMS+ | 19.7 ± 36.4  | 0.03  |
|                                                       | AMS- | 35.3 ± 42.9  |       |
| AHI + nasal flow limitation (events.h <sup>-1</sup> ) | AMS+ | 19.5 ± 18.0  | 0.03  |
|                                                       | AMS- | 35.4 ± 24.9  |       |
| Total number of limitations                           | AMS+ | 9.2 ± 6.6    | 0.09  |
|                                                       | AMS- | 14.3 ± 8.5   |       |
| Snoring /h                                            | AMS+ | 67.0 ± 103.7 | 0.4   |
|                                                       | AMS- | 74.7 ± 114.3 |       |

| Measurements                                         |      | Mean $\pm$ SD     | Statistical comparisons |
|------------------------------------------------------|------|-------------------|-------------------------|
|                                                      |      |                   | P value                 |
| Sleep mean SpO <sub>2</sub> (%)                      | AMS+ | 81.6 $\pm$ 2.6    | 0.005                   |
|                                                      | AMS- | 85.5 $\pm$ 2.4    |                         |
| Sleep min SpO <sub>2</sub> (%)                       | AMS+ | 73.6 $\pm$ 3.1    | 0.005                   |
|                                                      | AMS- | 78.0 $\pm$ 2.6    |                         |
| Number of desaturations of more than 3%              | AMS+ | 106.3 $\pm$ 101.9 | 0.03                    |
|                                                      | AMS- | 194.3 $\pm$ 133.4 |                         |
| Number of desaturation /h                            | AMS+ | 17.9 $\pm$ 16.9   | 0.048                   |
|                                                      | AMS- | 30.7 $\pm$ 19.9   |                         |
| Duration spent under 90% SpO <sub>2</sub> (% du TST) | AMS+ | 98.7 $\pm$ 1.8    | 0.003                   |
|                                                      | AMS- | 91.0 $\pm$ 8.1    |                         |
| Mean SpO <sub>2</sub> in stage I (%)                 | AMS+ | 83.2 $\pm$ 2.7    | 0.009                   |
|                                                      | AMS- | 86.4 $\pm$ 2.6    |                         |
| Mean SpO <sub>2</sub> in stage II (%)                | AMS+ | 82.4 $\pm$ 2.7    | 0.006                   |
|                                                      | AMS- | 85.9 $\pm$ 2.5    |                         |
| Mean SpO <sub>2</sub> in stage III (%)               | AMS+ | 82.2 $\pm$ 2.3    | 0.07                    |
|                                                      | AMS- | 84.3 $\pm$ 3.1    |                         |
| Mean SpO <sub>2</sub> in REM sleep (%)               | AMS+ | 80.3 $\pm$ 3.0    | 0.001                   |
|                                                      | AMS- | 85.8 $\pm$ 2.6    |                         |
| Min SpO <sub>2</sub> in stage I (%)                  | AMS+ | 76.2 $\pm$ 4.6    | 0.048                   |
|                                                      | AMS- | 79.9 $\pm$ 3.7    |                         |
| Min SpO <sub>2</sub> in stage II (%)                 | AMS+ | 75.3 $\pm$ 3.6    | 0.01                    |
|                                                      | AMS- | 79.5 $\pm$ 3.2    |                         |
| Min SpO <sub>2</sub> in stage III (%)                | AMS+ | 78.2 $\pm$ 3.1    | 0.007                   |
|                                                      | AMS- | 82.8 $\pm$ 3.9    |                         |
| Min SpO <sub>2</sub> in REM sleep (%)                | AMS+ | 74.5 $\pm$ 3.1    | 0.002                   |
|                                                      | AMS- | 79.3 $\pm$ 2.1    |                         |

E-table 3. Transthoracic echocardiography measurement in both groups during normoxic and hypoxic exposure at rest.

| Measurement                                                                                       | Group | Normoxia     | Hypoxia      | p     |
|---------------------------------------------------------------------------------------------------|-------|--------------|--------------|-------|
| LVEF (Left ventricular ejection fraction) visual method                                           | AMS+  | 61.58 ± 6.96 | 67.44 ± 9.79 | 0.10  |
|                                                                                                   | AMS-  | 70.17 ± 5.97 | 71.50 ± 8.65 | 0.34  |
|                                                                                                   | p     | 0.003        | 0.04         |       |
| LVEF (Teicholtz method)                                                                           | AMS+  | 60.75 ± 8.70 |              |       |
|                                                                                                   | AMS-  | 66.82 ± 6.10 |              |       |
|                                                                                                   | p     | 0.04         |              |       |
| LVSF (Left Ventricular Shortening Fraction)                                                       | AMS+  | 0.34 ± 0.08  | 0.38 ± 0.08  | 0.18  |
|                                                                                                   | AMS-  | 0.37 ± 0.05  | 0.40 ± 0.06  | 0.01  |
|                                                                                                   | p     | 0.18         | 0.35         |       |
| St<br>Systolic myocardial peak velocity of the tricuspid annulus in pulse doppler tissue imaging  | AMS+  | 16.99 ± 3.82 | 16.53 ± 3.21 | 0.33  |
|                                                                                                   | AMS-  | 15.71 ± 2.73 | 15.60 ± 1.22 | 0.44  |
|                                                                                                   | p     | 0.15         | 0.29         |       |
| E/A<br>Pulse wave-doppler measurements of the early (E) and late (A) mitral inflow velocity)      | AMS+  | 1.34 ± 0.57  | 0.97 ± 0.41  | 0.04  |
|                                                                                                   | AMS-  | 1.44 ± 0.50  | 1.05 ± 0.25  | 0.003 |
|                                                                                                   | p     | 0.39         | 0.29         |       |
| E/Ea<br>Ea: early diastolic velocity of the medial mitral annulus in pulse doppler tissue imaging | AMS+  | 4.77 ± 1.02  | 4.58 ± 1.29  | 0.40  |
|                                                                                                   | AMS-  | 5.81 ± 1.62  | 4.54 ± 0.54  | 0.02  |
|                                                                                                   | p     | 0.01         | 0.50         |       |

|                 |      |               |               |      |
|-----------------|------|---------------|---------------|------|
| Heart Rate (HR) | AMS+ | 60.33 ± 11.40 | 68.56 ± 5.66  | 0.01 |
|                 | AMS- | 56.27 ± 12.31 | 66.50 ± 14.78 | 0.04 |
|                 | p    | 0.17          | 0.46          |      |

|                                                               |      |              |              |      |
|---------------------------------------------------------------|------|--------------|--------------|------|
| LV-TVI<br>left ventricular outflow time-<br>velocity integral | AMS+ | 18.95 ± 2.14 | 19.47 ± 2.57 | 0.44 |
|                                                               | AMS- | 19.89 ± 3.26 | 19.64 ± 2.36 | 0.43 |
|                                                               | p    | 0.30         | 0.41         |      |

|               |      |             |             |      |
|---------------|------|-------------|-------------|------|
| Stroke volume | AMS+ | 3.76 ± 1.02 | 4.16 ± 0.88 | 0.09 |
|               | AMS- | 3.82 ± 0.99 | 4.46 ± 1.05 | 0.13 |
|               | p    | 0.39        | 0.40        |      |

|                                                        |      |             |             |      |
|--------------------------------------------------------|------|-------------|-------------|------|
| TVR (Maximal Tricuspid<br>regurgitation peak velocity) | AMS+ | 2.01 ± 0.28 | 2.28 ± 0.56 | 0.02 |
|                                                        | AMS- | 2.20 ± 0.24 | 2.37 ± 0.21 | 0.02 |
|                                                        | p    | 0.07        | 0.43        |      |

|                                                    |      |              |               |      |
|----------------------------------------------------|------|--------------|---------------|------|
| RV-RA gradient (right<br>ventricle - right atrium) | AMS+ | 16.75 ± 5.14 | 21.82 ± 12.43 | 0.04 |
|                                                    | AMS- | 20.33 ± 4.50 | 22.22 ± 4.29  | 0.13 |
|                                                    | p    | 0.09         | 0.44          |      |

|                                              |      |              |               |      |
|----------------------------------------------|------|--------------|---------------|------|
| PASP (pulmonary artery<br>systolic pressure) | AMS+ | 22.00 ± 7.04 | 27.82 ± 11.83 | 0.03 |
|                                              | AMS- | 27.25 ± 6.63 | 27.22 ± 5.78  | 0.47 |
|                                              | p    | 0.20         | 0.49          |      |

|                                                     |      |              |              |      |
|-----------------------------------------------------|------|--------------|--------------|------|
| Right ventricular outflow<br>time-velocity integral | AMS+ | 16.49 ± 2.57 | 14.69 ± 2.26 | 0.07 |
|                                                     | AMS- | 19.33 ± 3.16 | 17.01 ± 2.86 | 0.06 |
|                                                     | p    | 0.04         | 0.03         |      |



|                                      |      |             |             |      |
|--------------------------------------|------|-------------|-------------|------|
| Pulmonary vascular resistances (PVR) | AMS+ | 1.40 ± 0.14 | 1.71 ± 0.46 | 0.09 |
|                                      | AMS- | 1.24 ± 0.13 | 1.57 ± 0.33 | 0.01 |
|                                      | p    | 0.01        | 0.16        |      |

|                                                    |      |              |              |      |
|----------------------------------------------------|------|--------------|--------------|------|
| TAPSE (Tricuspid annular plane systolic excursion) | AMS+ | 26.88 ± 3.27 | 26.81 ± 2.24 | 0.49 |
|                                                    | AMS- | 28.11 ± 7.51 | 26.00 ± 3.67 | 0.23 |
|                                                    | p    | 0.26         | 0.44         |      |

E-table 4. Results of univariate conditional logistic regression.

Significativity is considered when low and high limits values did not cross 1 and p-value < 0.05.

| Variables (medians)                                | Odds Ratio | Low limit | High Limit | p-value  |
|----------------------------------------------------|------------|-----------|------------|----------|
| Eupneic P <sub>ET</sub> CO <sub>2</sub> (>=38/<38) | 7          | 0.861     | 56.895     | 0.0687   |
| HCVR Threshold (>=46.8/<46.8)                      | 4          | 0.849     | 18.836     | 0.0795   |
| i:hvr <sub>5</sub> (>=0.58/<0.58)                  | 0.125      | 0.016     | 0.999      | 0.0499 * |
| i:hvr <sub>20</sub> (>=0.37/<0.37)                 | 1.5        | 0.251     | 8.977      | 0.6569   |
| V <sub>c</sub> (>=96/<96)                          | 0.333      | 0.067     | 1.652      | 0.1785   |
| PVR in normoxia (>=0.115/<0.115)                   | 5          | 0.584     | 42.797     | 0.1418   |
| PASP in normoxia (>=23/<23)                        | 0.25       | 0.028     | 2.237      | 0.215    |
| ET-1 after normoxic night (>=0.415/<0.415)         | 1          | 0.141     | 7.099      | 0.99     |
| LVEF in normoxia (>=65/<65)                        | 0.143      | 0.018     | 1.161      | 0.0687   |
| HCVR slope (>=3.25/<3.25)                          | 0.429      | 0.111     | 1.657      | 0.2195   |

Statistical reference: selection of important variables and determination of functional form for continuous predictors in multivariable model building. 2007 Statistics in medicine. Willy Sauerbrei. In each analysis, the variable of interest is significantly related with altitude illness, if the odds ratio of the variable in AMS + and – group respectively is (i) either above the higher limit of (positive correlation) and the lower limit of the confidence interval does not cross one or (ii) below the lower limit with a confidence interval above one. Each variable is a distinct and independent variable. A single analysis is performed for correlated variables.

E-table 5. Technical details for biological analysis.

| Variable       | Kit name                                         | Brand.                          |
|----------------|--------------------------------------------------|---------------------------------|
| Endothelin-1   | Endothelin (1-21) ®, BI-20052                    | Biomedica Gruppe                |
| Big-endothelin | Big endothelin®, BI-20082                        | Biomedica Gruppe                |
| Aldosterone    | DSL-8600 ACTIVE® Aldosterone Coated Tube RIA Kit | Diagnostic Systems Laboratories |
| Vasopressin    | Vasopressin125I RIA Kit®                         | DiaSorin                        |
| Renin          | Renin III Generation®                            | IBL-America                     |
